# Supplementary material for: Myosin binding protein H-like (MYBPHL): a promising biomarker to predict atrial damage
Source: Springer Nature journal article supplement (doi:10.1038/s41598-019-46123-w), 2019-07-10

# **Myosin binding protein H-like (MYBPHL): a promising biomarker to predict atrial damage**

Harald Lahm, Martina Dreßen, Nicole Beck, Stefanie Doppler, Marcus-André Deutsch, Matsushima Shunsuke, Irina Neb, Karl Christian König, Konstantinos Sideris, Stefanie Voss, Lena Eschenbach, Nazan Puluca, Isabel Deisenhofer, Sophia Doll, Stefan Holdenrieder, Matthias Mann, Rüdiger Lange, Markus Krane

**Figure S1.** Relative protein expression of candidate genes in 16 human heart regions.

**Figure S2.** CK-MB values in plasma of patients with atrial fibrillation.

**Figure S3.** Troponin T values in plasma of patients with atrial fibrillation.

**Figure S4.** MYBPHL in patients with atrioventricular node ablation.

**Figure S5.** Sensitivity of the MYBPHL ELISA.

**Figure S6.** Intra-assay variation of samples.

**Figure S7.** Inter-assay variation of samples.

**Figure S8.** Comparison of MYBPHL values in plasma and serum samples.

**Table S1.** MAZE patients.

**Table S2.** AVR and TAVI patients.

**Table S3.** Patients with atrioventricular node ablation.

**Table S4.** Primers used for qRT-PCR analysis.

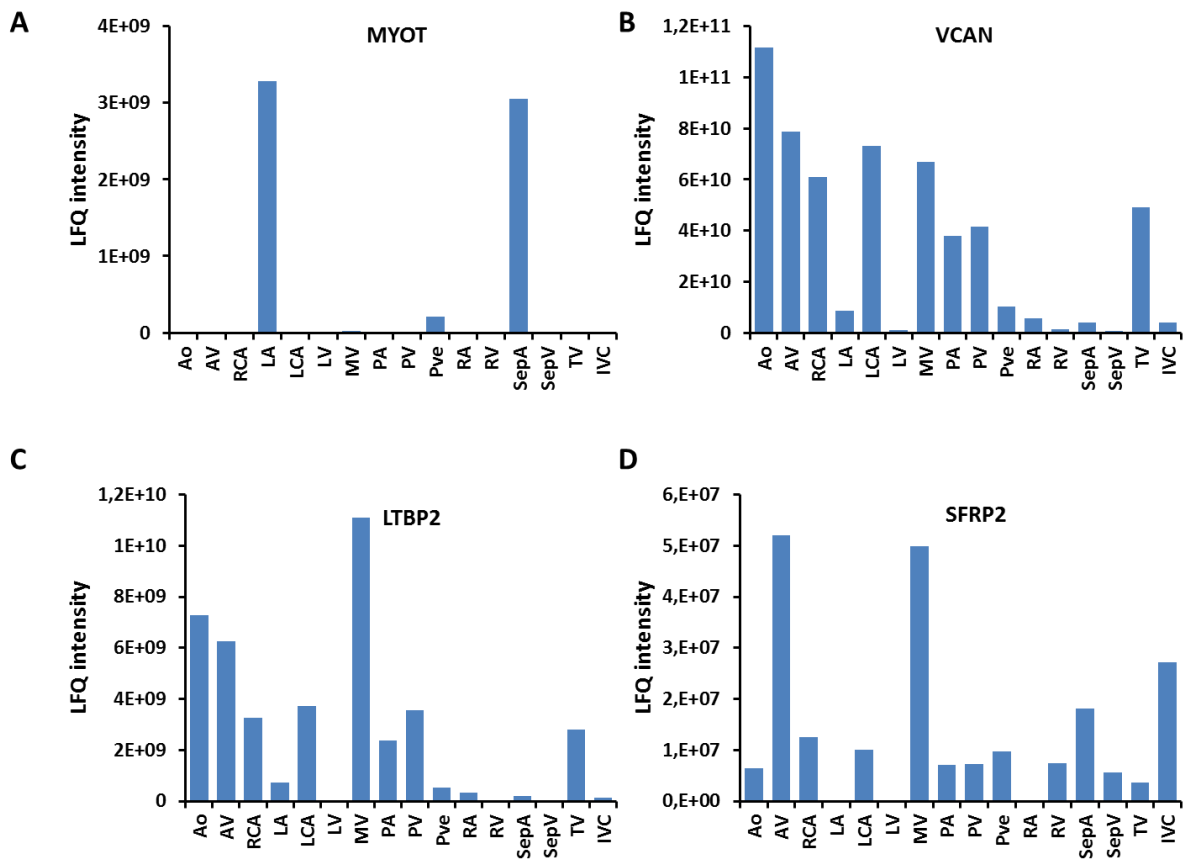

**Figure S1. Relative protein amount of candidate genes in 16 regions of the human heart.** Protein amounts are represented as label-free quantification intensity.

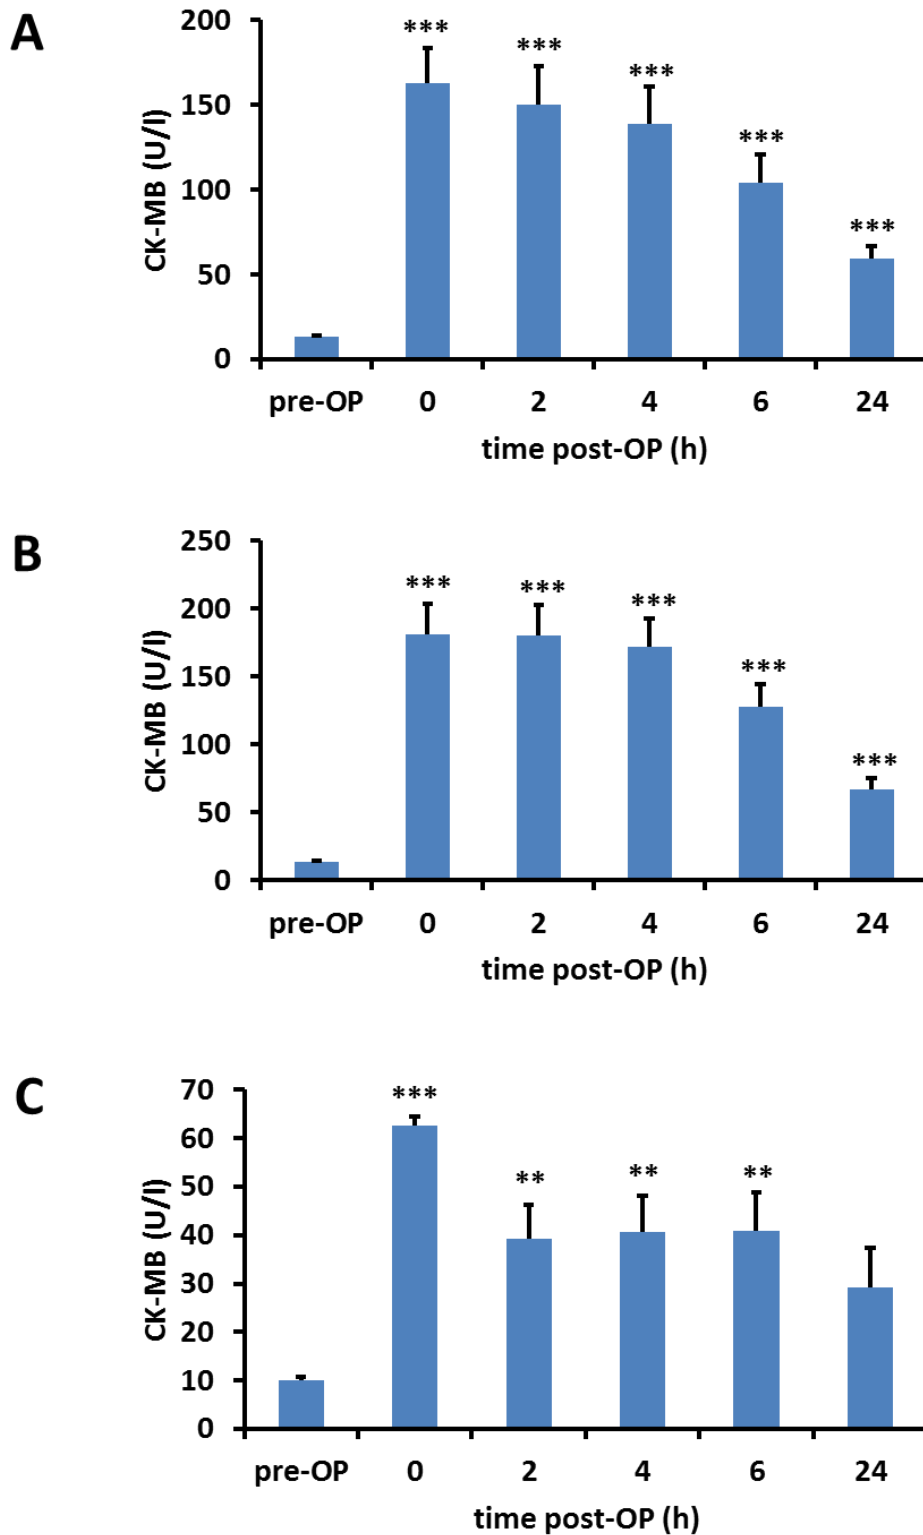

**Figure S2. CK-MB values in plasma of patients with atrial fibrillation.** **A:** Time course of CK-MB in patients with atrial fibrillation receiving cryo-ablation ( $n = 17$ ). **B, C:** Time course of CK-MB expression in atrial patients with endo- (**B**) ( $n = 12$ ) or epicardial (**C**) ( $n = 5$ ) cryo-ablation. Values represent the mean  $\pm$  SE. \*\*:  $p < 0.01$ , \*\*\*  $p < 0.001$ .

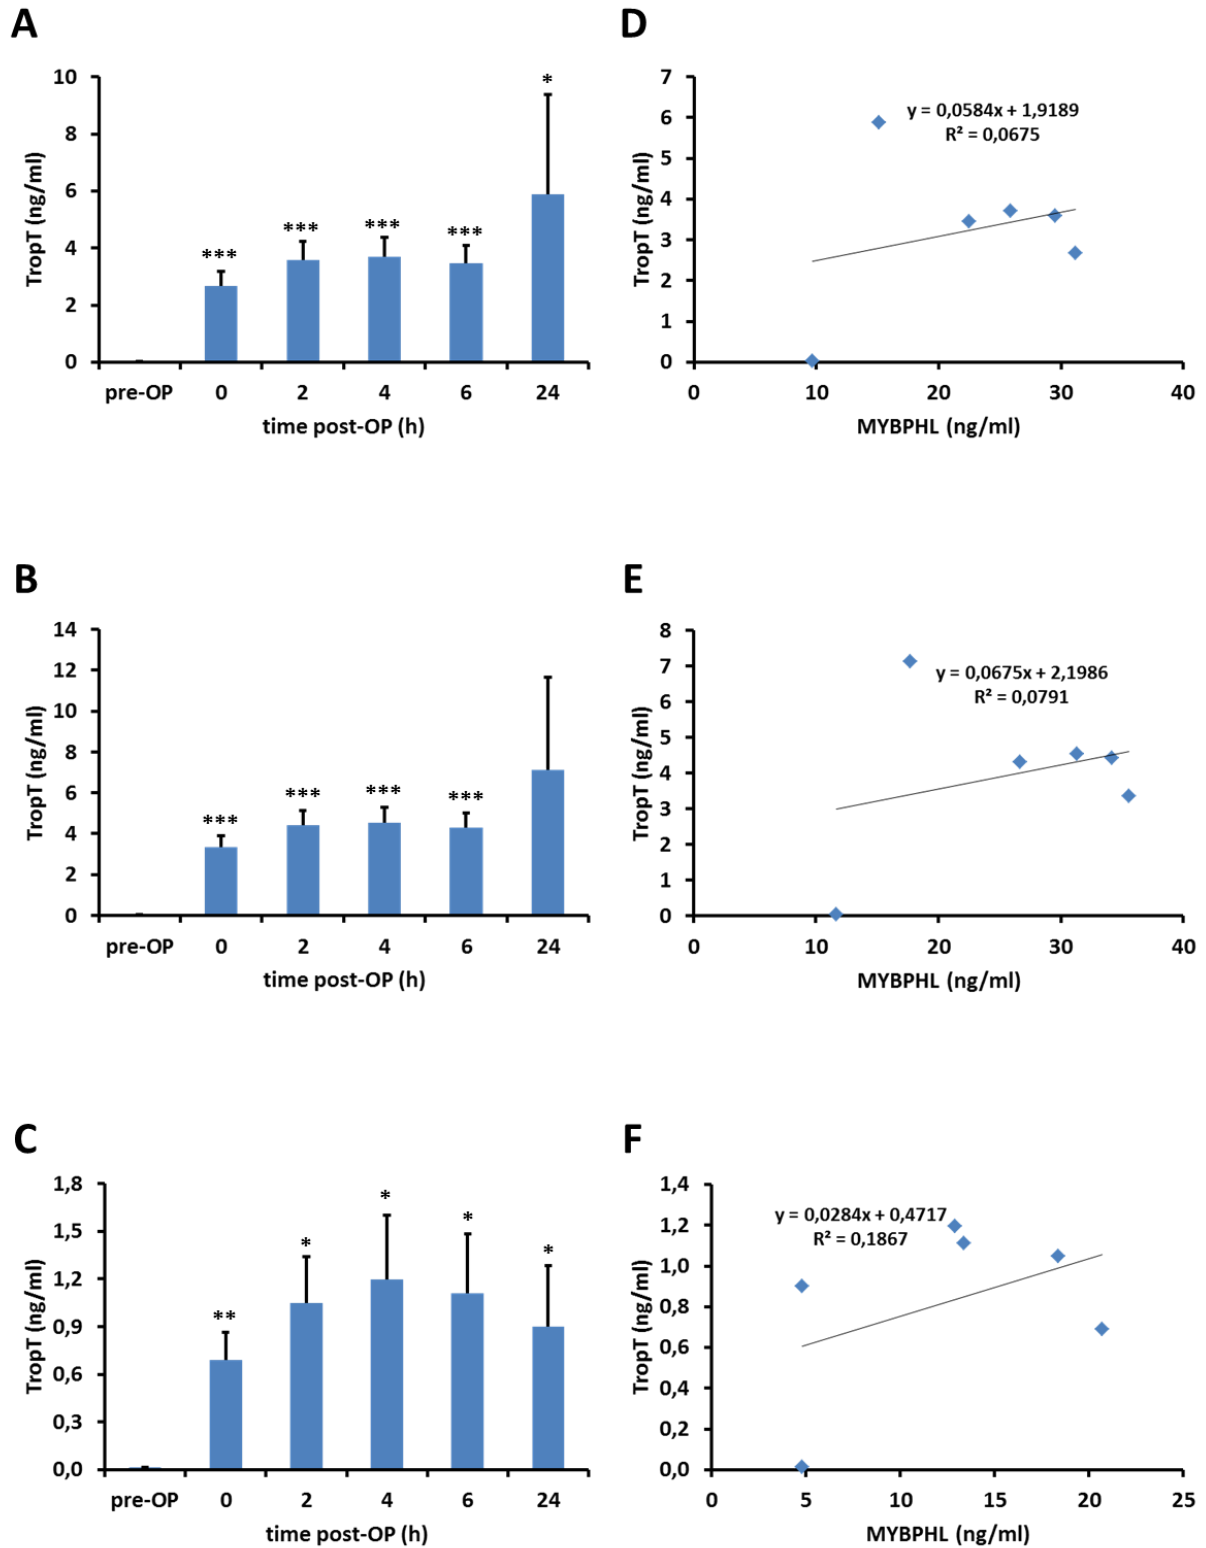

**Figure S3. Troponin T values in plasma of patients with atrial fibrillation. A:** Time course of troponin T in patients with atrial fibrillation receiving cryo-ablation ( $n = 17$ ). **B, C:** Time course of troponin T expression in atrial patients with endo- (**B**) ( $n = 12$ ) or epicardial (**C**) ( $n = 5$ ) cryo-ablation. **D - F:** Correlation between MYBPHL and troponin T. Values represent the mean  $\pm$  SE. \*:  $p < 0.05$ , \*\*:  $p < 0.01$ , \*\*\*  $p < 0.001$ .

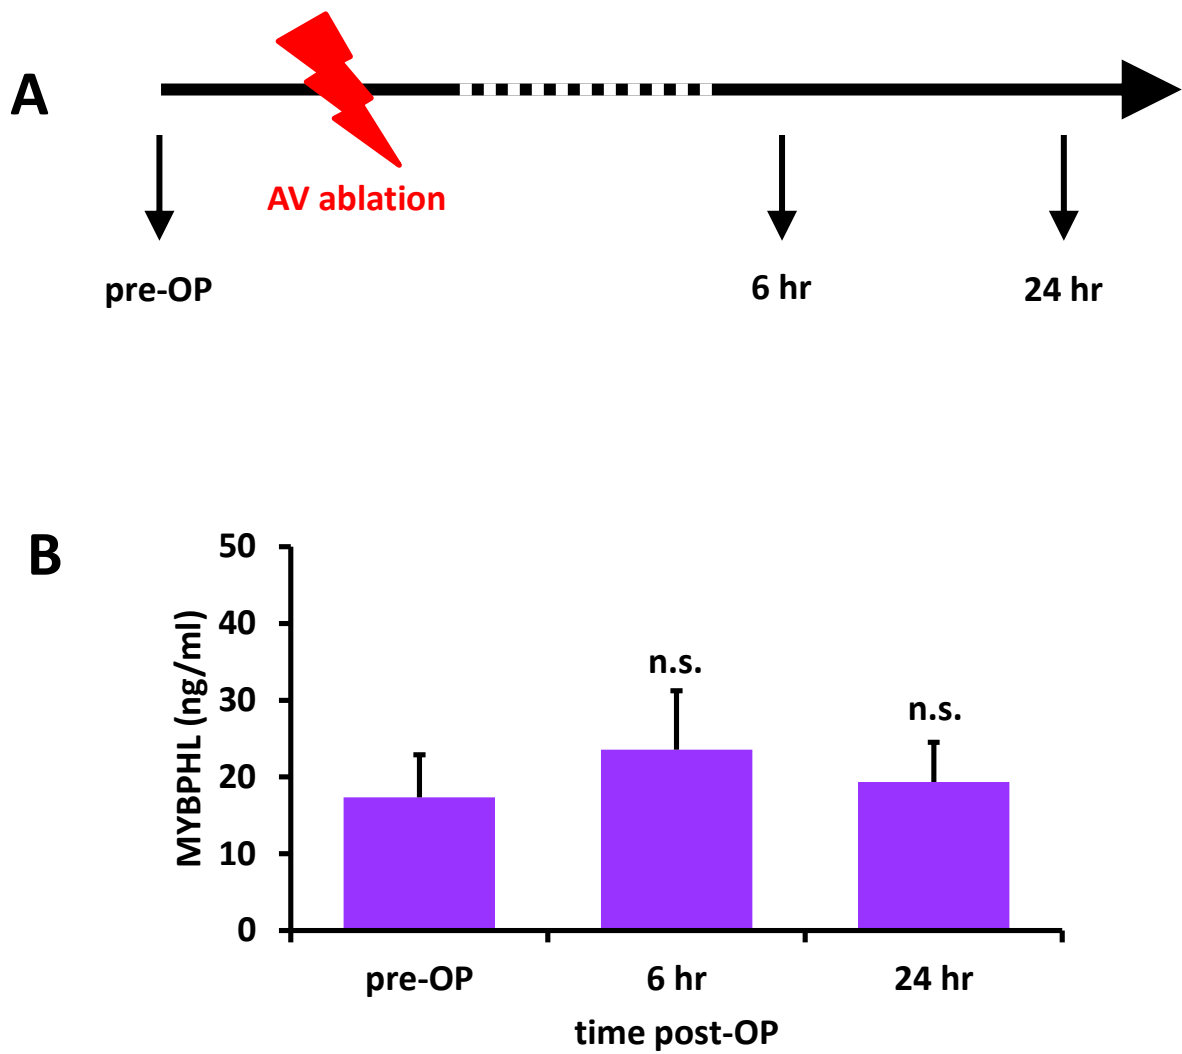

**Figure S4: MYBPHL in patients with atrioventricular node ablation.**

**A:** Scheme of serum sampling. **B:** Time course of MYBPHL in patients with atrial node ablation ( $n = 6$ ). Values are presented as the mean  $\pm$  SEM. n.s.: not significant.

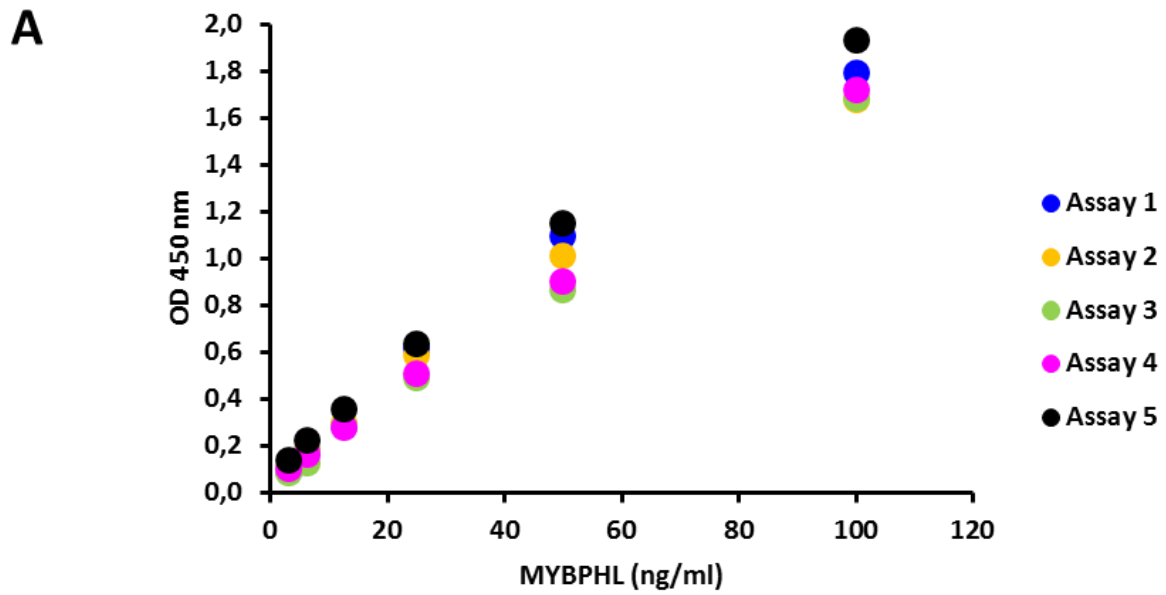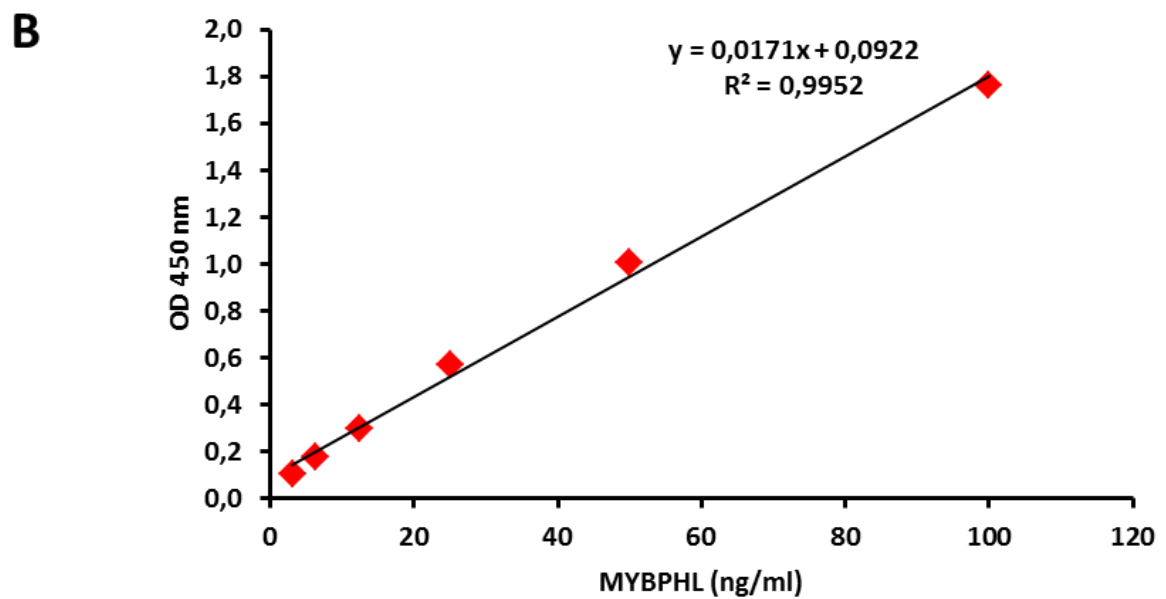

**Figure S5. Sensitivity of the MYBPHL ELISA. A:** OD450 nm values of graded MYBPHL concentrations measured in five independent assays. **B:** Cumulative standard curve obtained by five independent assays.

Sample 1

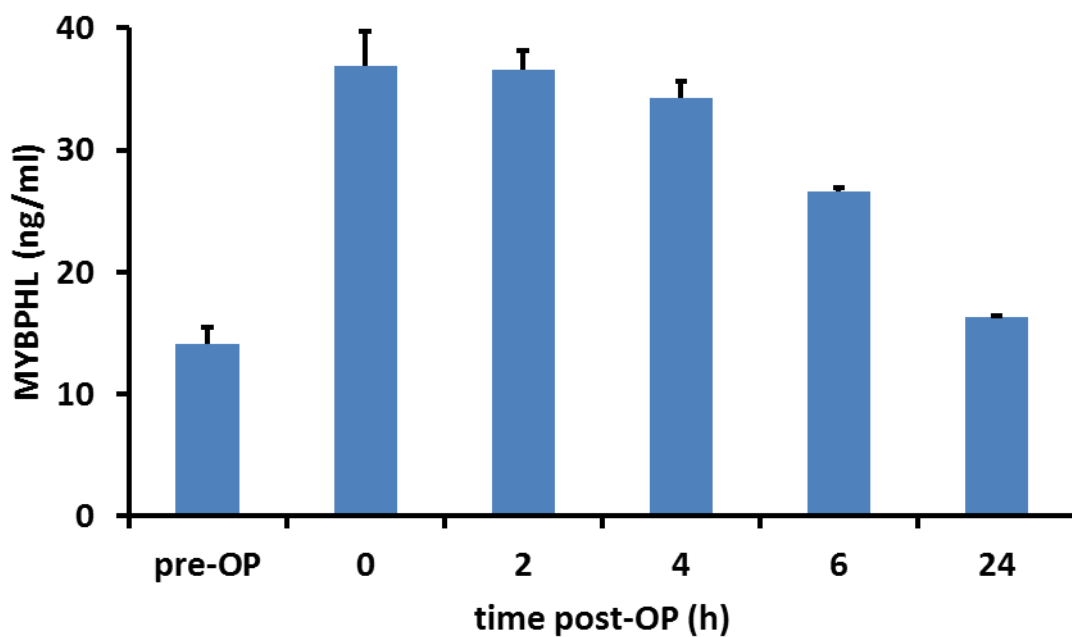

Sample 2

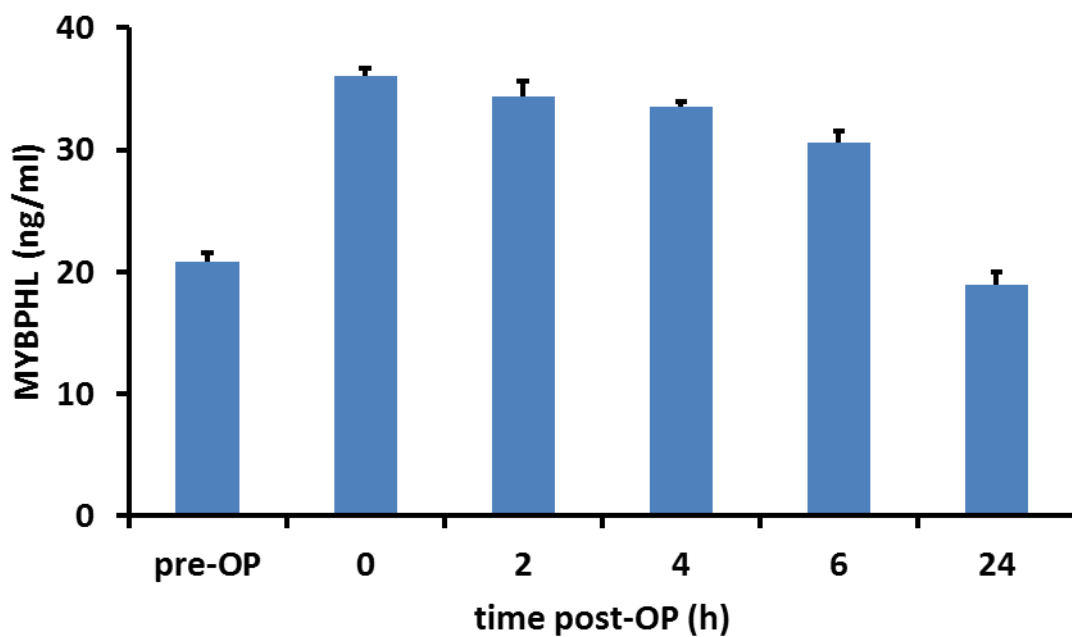

**Figure S6. Intra-assay variation of samples.** Representative examples of two different patients where plasma samples were applied on the same microtiter plate. Values represent the mean  $\pm$  SE.

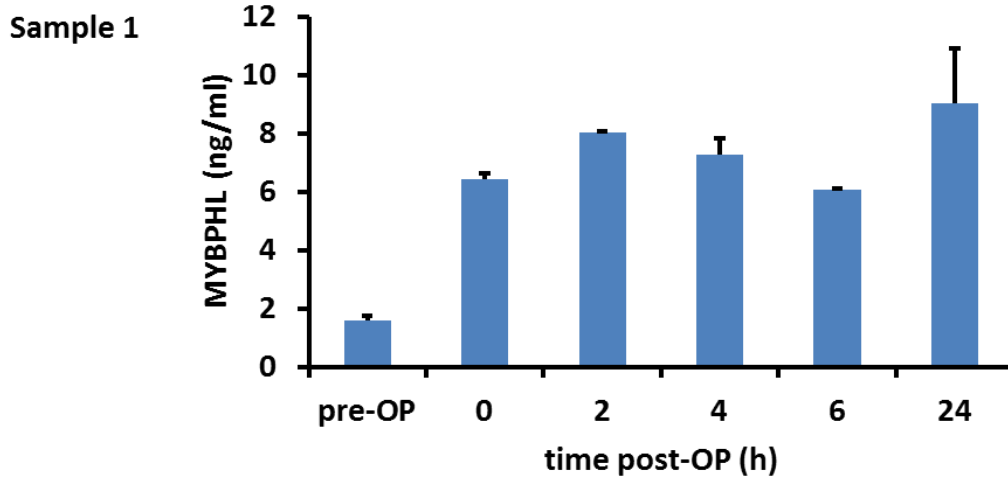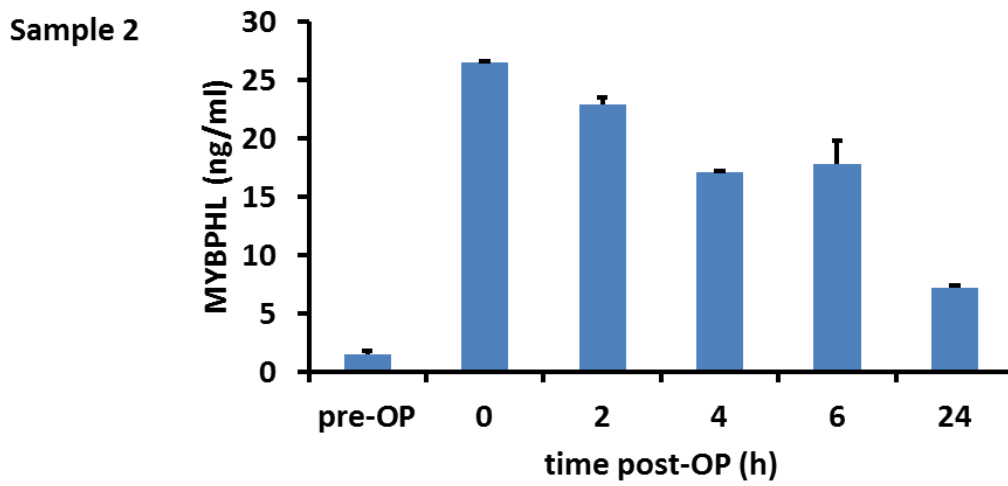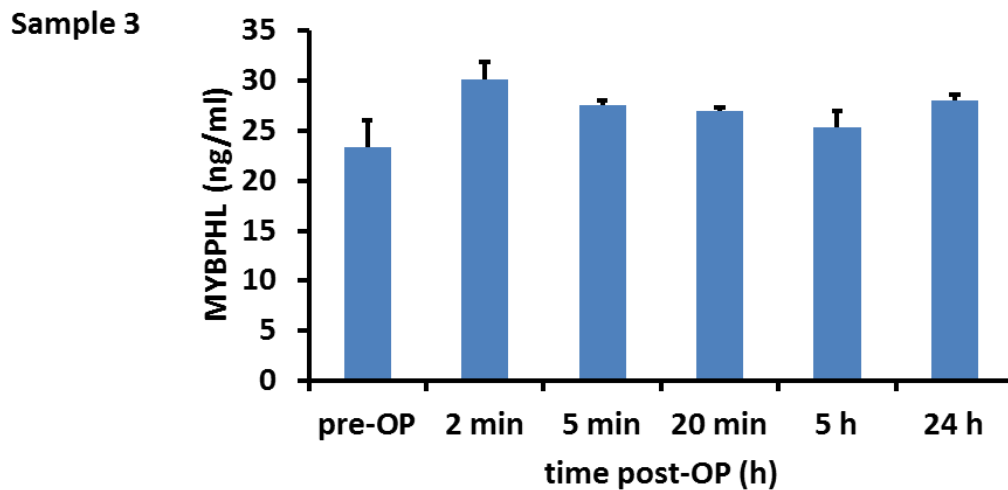

**Figure S7. Inter-assay variation of samples.** Representative examples of three different patients where plasma samples were applied on two different microtiter plates. Values represent the mean  $\pm$  SE.



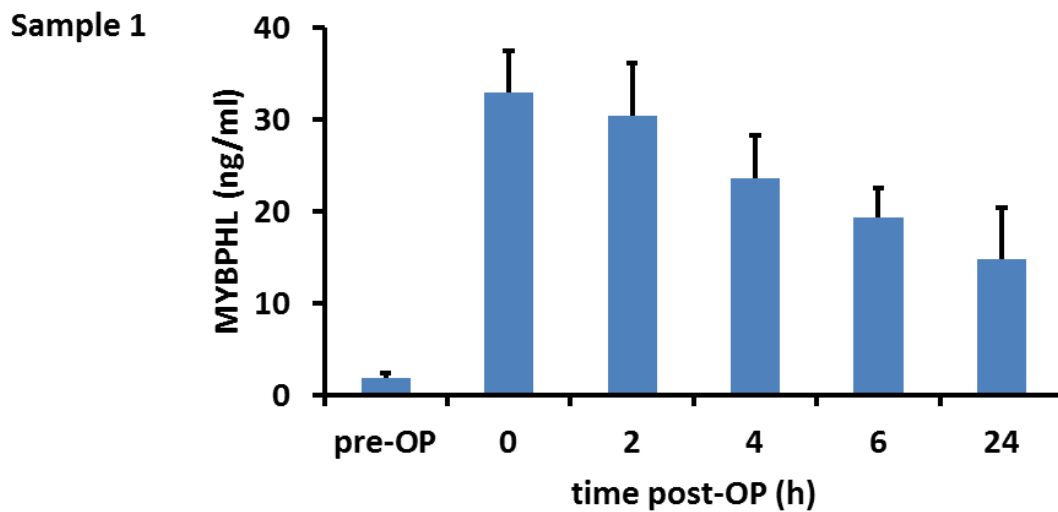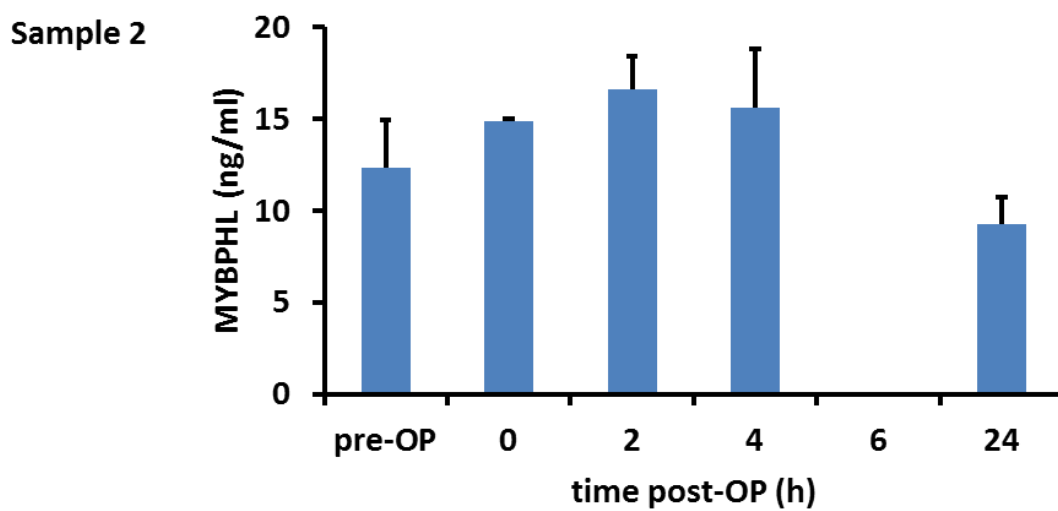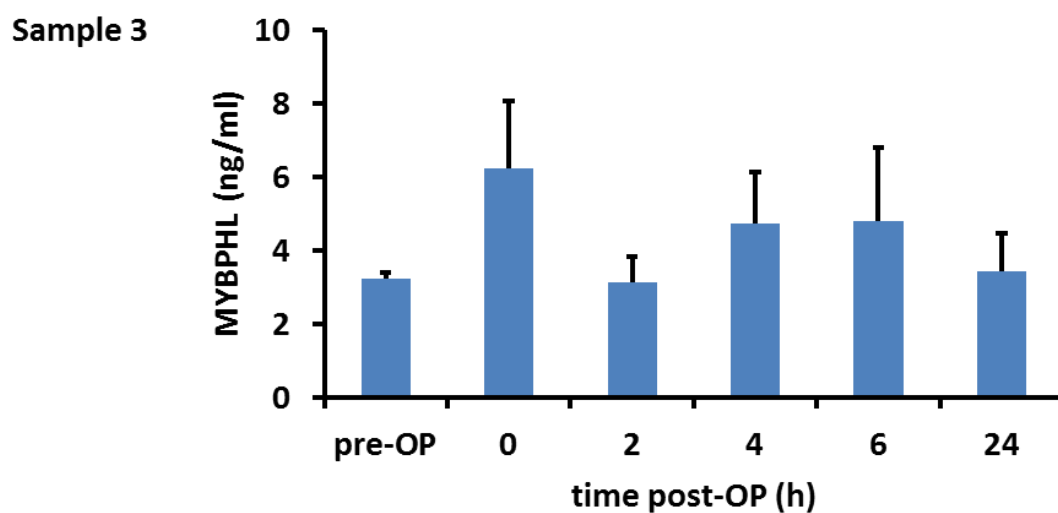

**Figure S8. Comparison of MYBPHL values in plasma and serum samples.** Representative examples of three different patients where plasma and serum samples were analyzed for their MYBPHL concentration. Values represent the mean  $\pm$  SE.

**Supplementary Table S1. MAZE Patients.**

| <b>patient</b> | <b>age</b> | <b>sex (m/f)</b> | <b>HLM* (min)</b> | <b>ablation</b> | <b>clinical procedure**</b> |
|----------------|------------|------------------|-------------------|-----------------|-----------------------------|
| #1             | 61         | female           | 98                | endocardial     | MVR                         |
| #2             | 64         | male             | 129               | endocardial     | MVR                         |
| #3             | 75         | female           | 111               | endocardial     | MVR + TVR                   |
| #4             | 67         | male             | 110               | endocardial     | MVR + TVR                   |
| #5             | 69         | female           | 78                | endocardial     | MVR                         |
| #6             | 77         | female           | 87                | endocardial     | MVR + TVR                   |
| #7             | 66         | male             | 97                | endocardial     | AVR                         |
| #8             | 74         | male             |                   | endocardial     | AVR + MVR                   |
| #9             | 69         | female           | 107               | endocardial     | TVR                         |
| #10            | 65         | female           | 73                | endocardial     | MVR + TVR                   |
| #11            | 78         | male             | 71                | endocardial     | MVR                         |
| #12            | 52         | female           | 90                | endocardial     | MVR                         |
|                | 68.1±2.1   |                  | 95.6±5.0          |                 |                             |
| #13            | 59         | male             | 37                | epicardial      | HOCM                        |
| #14            | 77         | male             | 118               | epicardial      | AVR + ACVB                  |
| #15            | 81         | female           | 59                | epicardial      | ACVB                        |
| #16            | 78         | male             | 80                | epicardial      | AVR                         |
| #17            | 80         | female           | 101               | epicardial      | ACVB                        |
|                | 75.0±3.6   |                  | 79.0±12.9         |                 |                             |

\*: heart-lung machine, \*\*: AVR: aortic valve replacement, MVR: mitral valve replacement, TVR: tricuspid valve replacement, ACVB: aortocoronary venous bypass, HOCM: hypertrophic obstructive cardiomyopathy.

**Supplementary Table S2. AVR and TAVI patients.**

| <b>patient</b>                          | <b>age</b> | <b>sex (m/f)</b> | <b>HLM* (min)</b> | <b>ablation</b> | <b>clinical procedure**</b> |
|-----------------------------------------|------------|------------------|-------------------|-----------------|-----------------------------|
| aortic valve replacement                |            |                  |                   |                 |                             |
| #1                                      | 66         | female           | 59                | none            | AVR                         |
| #2                                      | 63         | male             | 50                | none            | AVR                         |
| #3                                      | 75         | female           | 52                | none            | AVR                         |
| #4                                      | 70         | female           | 73                | none            | AVR                         |
| #5                                      | 73         | female           | 64                | none            | AVR                         |
|                                         | 69.4±2.0   |                  | 59.6±3.7          |                 |                             |
| transcatheter aortic valve implantation |            |                  |                   |                 |                             |
| #1                                      | 69         | male             | none              | none            | transfemoral implantation   |
| #2                                      | 76         | male             | none              | none            | transfemoral implantation   |
| #3                                      | 78         | male             | none              | none            | transfemoral implantation   |
| #4                                      | 90         | male             | none              | none            | transfemoral implantation   |
| #5                                      | 64         | male             | none              | none            | transfemoral implantation   |
|                                         | 75.4±4.0   |                  |                   |                 |                             |
| Controls                                | 35.1±2.9   | 4 / 7            |                   |                 |                             |

\*: heart-lung machine, \*\*: AVR: aortic valve replacement.

**Supplementary Table S3. Patients with atrioventricular node ablation.**

| <b>patient</b>                          | <b>age</b> | <b>sex (m/f)</b> | <b>HLM* (min)</b> | <b>ablation</b> | <b>clinical procedure</b>         |
|-----------------------------------------|------------|------------------|-------------------|-----------------|-----------------------------------|
| transcatheter aortic valve implantation |            |                  |                   |                 |                                   |
| #1                                      | 90         | female           | none              | radiofrequency  | ablation of atrioventricular node |
| #2                                      | 81         | male             | none              | radiofrequency  | ablation of atrioventricular node |
| #3                                      | 74         | female           | none              | radiofrequency  | ablation of atrioventricular node |
| #4                                      | 36         | female           | none              | radiofrequency  | ablation of atrioventricular node |
| #5                                      | 75         | female           | none              | radiofrequency  | ablation of atrioventricular node |
| #6                                      | 55         | male             | none              | radiofrequency  | ablation of atrioventricular node |
|                                         | 68.5±7.3   | 2 / 4            |                   |                 |                                   |

\*: heart-lung machine.

**Supplementary Table S4. Primers used for qRT-PCR analysis**

| <b>primer</b>          | <b>sequence</b>                       | <b>length of amplicon</b> |
|------------------------|---------------------------------------|---------------------------|
| hu $\beta$ -actin_F382 | 5' CCA ACC GCG AGA AGA TGA 3'         |                           |
| hu $\beta$ -actin_R478 | 5' CCA GAG GCG TAC AGG GAT AG 3'      | 96 bp                     |
| hu FHL2_F1076          | 5' GTG CAC CAA CCC CAT CAG 3'         |                           |
| hu FHL2_R1184          | 5' CAC CAG TGA GAG GGA GCA CT 3'      | 108 bp                    |
| hu LTBP_F4097          | 5' AGG GCT CCT TCA ACT GTC TAT G 3'   |                           |
| hu LTBP_R4187          | 5' CCA TAG TCC TCA CAC TCG TCA A 3'   | 90 bp                     |
| hu MYBPC3_F320         | 5' AAG TTC GAC CTC AAG GTC ATA GA 3'  |                           |
| hu MYBPC3_R412         | 5' TTC TCC AGG GGC TCC AGT 3'         | 92 bp                     |
| hu MYBPH_F548          | 5' CCA CAT CCG AGA GAA CAT TG 3'      |                           |
| hu MYBPH_R623          | 5' CAC CTG GCG GAT GTA GGT 3'         | 75 bp                     |
| hu MYBPHL_F249         | 5' GTT GGG GAC ACA GTG AAC CT 3'      |                           |
| hu MYBPHL_R319         | 5' TCA TGT GTC CAG ATG GCT TG 3'      | 70 bp                     |
| hu MYBPHL_t1_F405      | 5' GAC TCA GGT CGC TAC CAA CT 3'      |                           |
| hu MYBPHL_t1_R485      | 5' CTC AAT CAC CAG GAT GTC AAT G 3'   | 80 bp                     |
| hu MYBPHL_t2_F401      | 5' TGC TGA CTC AGA GAG GCC A 3'       |                           |
| hu MYBPHL_t2_R586      | 5' GTG CGG TGA TAG TGC TCC AG 3'      | 185 bp                    |
| hu MYOT_F1478          | 5' AAT TCA ACA CTG ACC GAA TAA GC 3'  |                           |
| hu MYOT_R1569          | 5' CCA CCC AGC ATC TTT CTT GT 3'      | 91 bp                     |
| hu PAM_F960            | 5' TTG CTG GCA TGT ACC CTA TGA 3'     |                           |
| hu PAM_R1038           | 5' CAT GAA ATG TCA GAA TTC ACC AC 3'  | 78 bp                     |
| hu SFRP2_F555          | 5' GCT GGA GCA CGA GAC CAT 3'         |                           |
| hu SFRP2_R629          | 5' TGG CAG TTC TTG TTG AGC A 3'       | 74 bp                     |
| hu VCAN_F9694          | 5' GCA CCT GTG TGC CAG GAT 3'         |                           |
| hu VCAN_R9763          | 5' CAG GGA TTA GAG TGA CAT TCA TCA 3' | 69 bp                     |

**Myosin binding protein H-like (MYBPHL): a promising biomarker to predict atrial damage**

Harald Lahm, Martina Dreßen, Nicole Beck, Stefanie Doppler, Marcus-André Deutsch, Matsushima Shunsuke, Irina Neb, Karl Christian König, Konstantinos Sideris, Stefanie Voss, Lena Eschenbach, Nazan Puluca, Isabel Deisenhofer, Sophia Doll, Stefan Holdenrieder, Matthias Mann, Rüdiger Lange, Markus Krane

**Supplementary information:  
Complete gels of qRT-PCR analyses**

Left atrium: MYBPHL

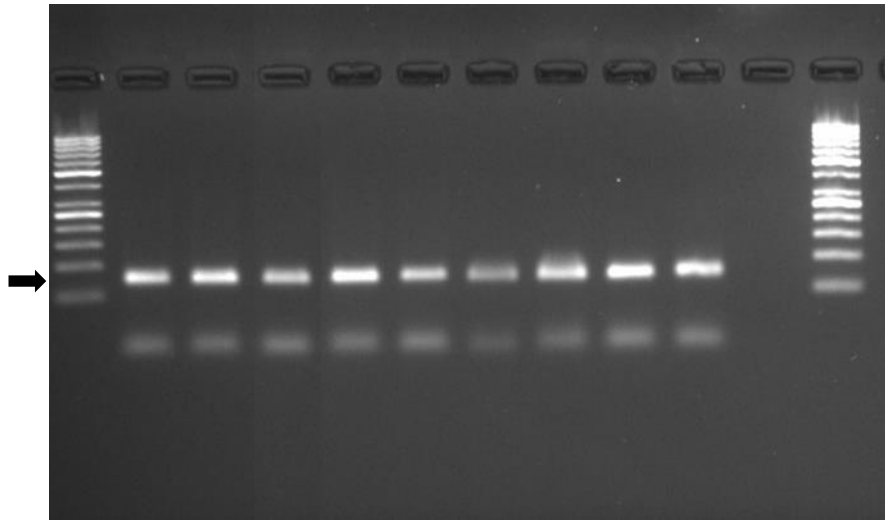

Left atrium: MYBPHL (isoform 1)

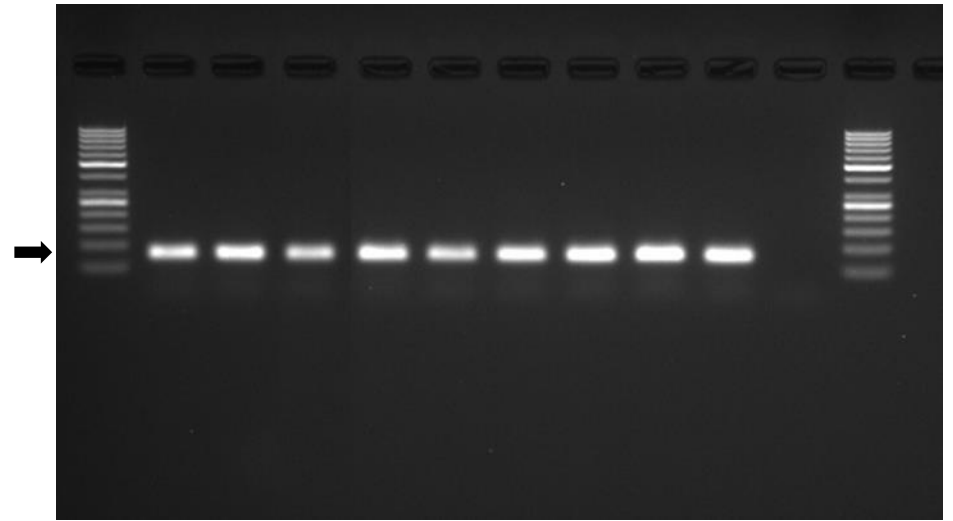

Left atrium: MYBPHL (isoform 2)

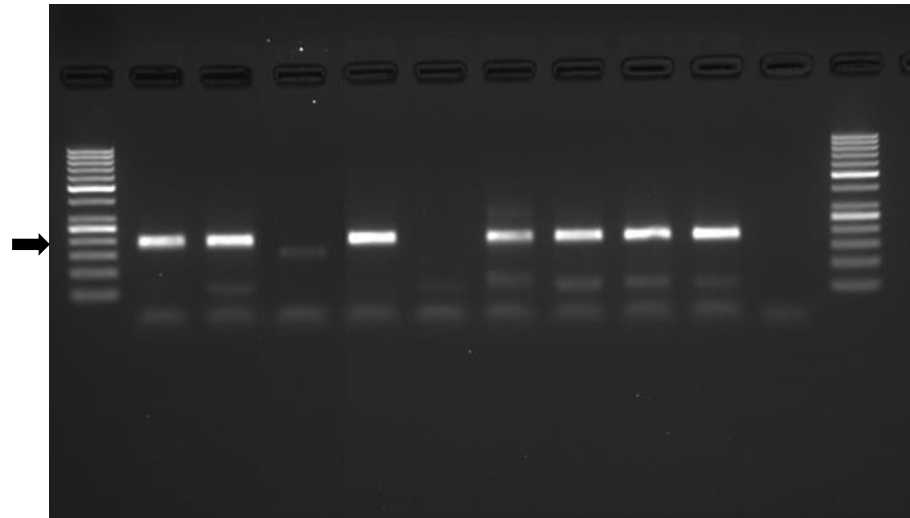

Left atrium: MYBPH

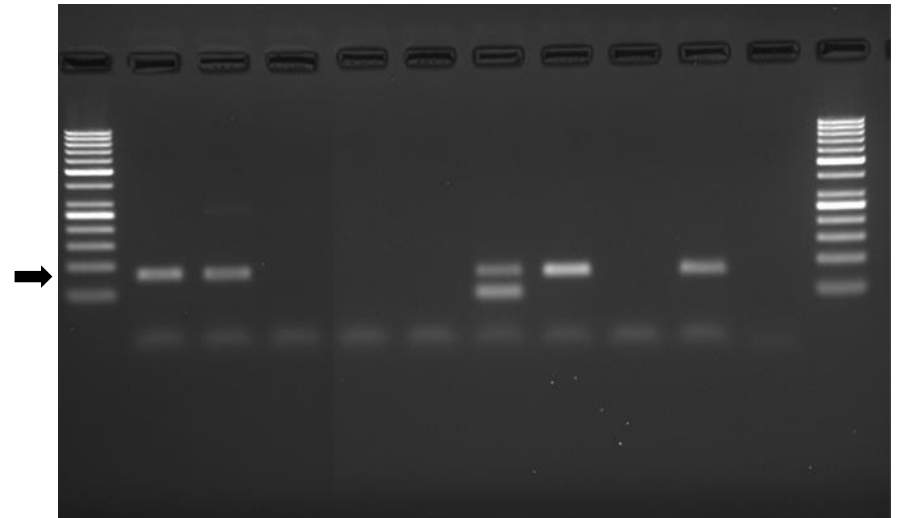

Left atrium: MYBPC3

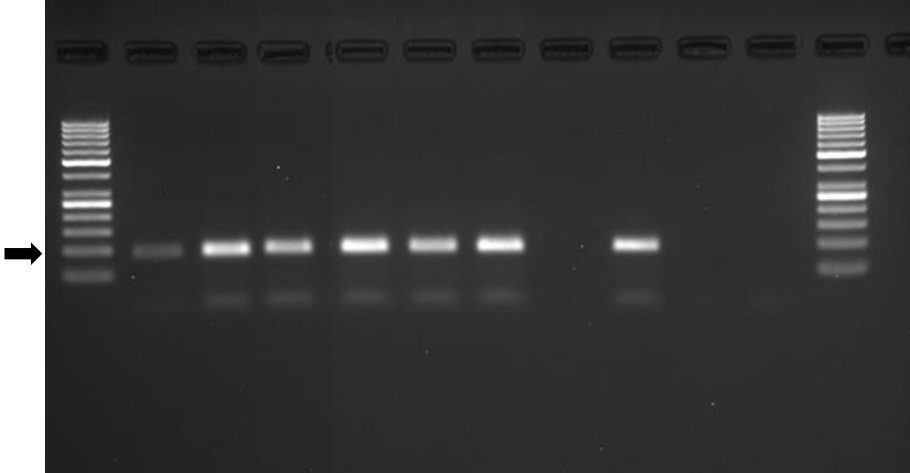

Left atrium: FHL2

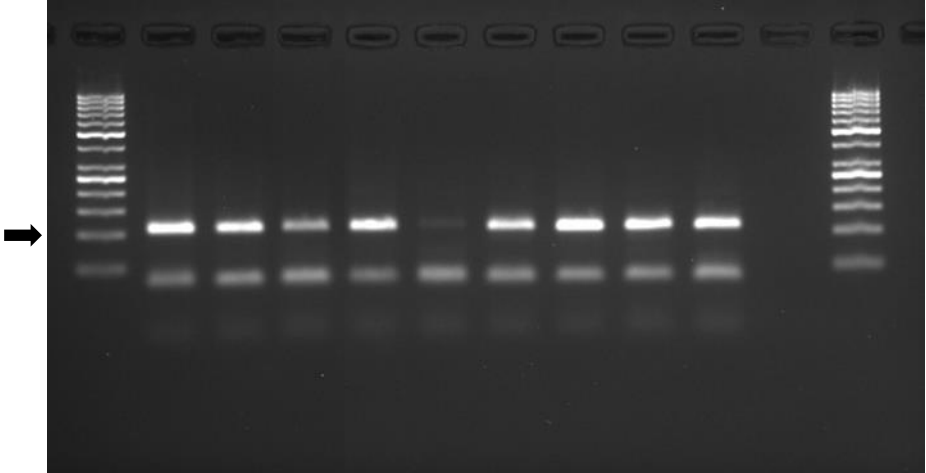

Left atrium: beta-actin

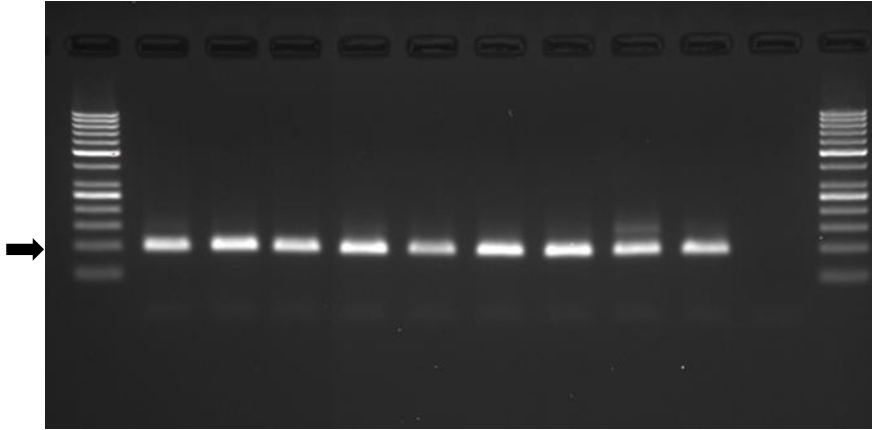



Left ventricle: MYBPHL

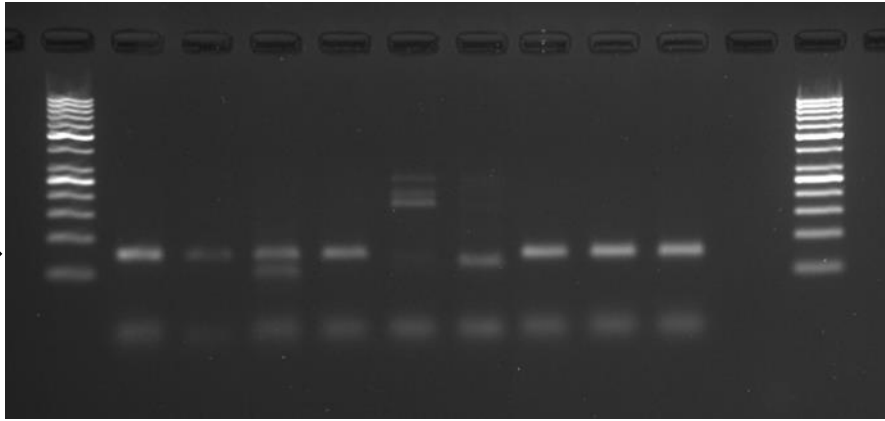

Left ventricle: MYBPHL (isoform 1)

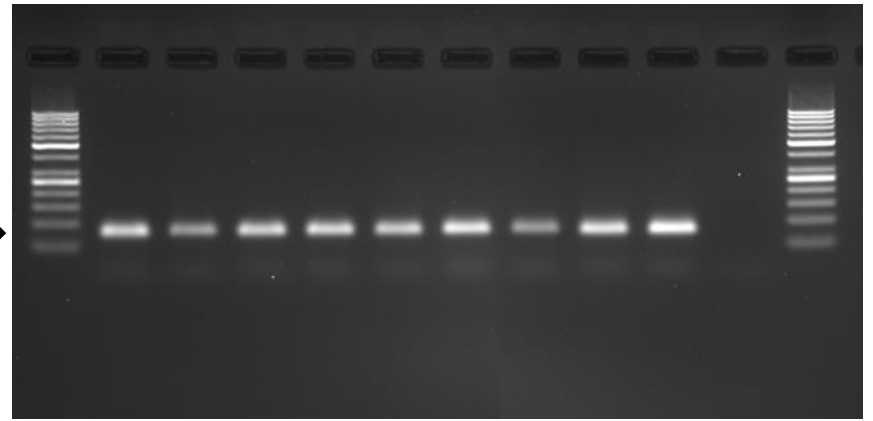

Left ventricle: MYBPHL (isoform 2)

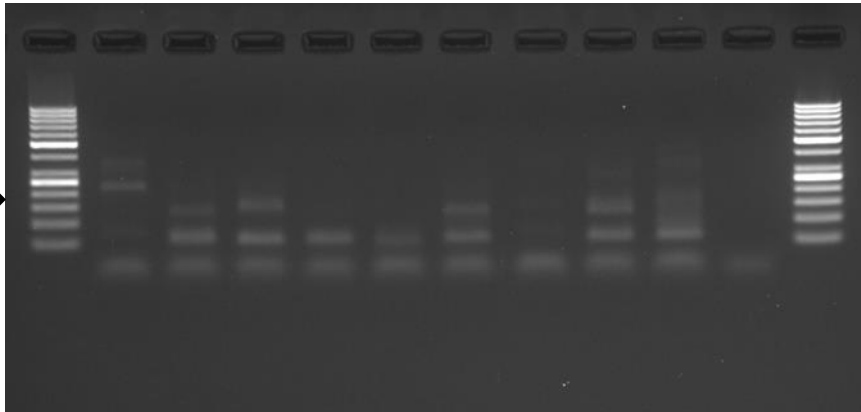

Left ventricle: MYBPH

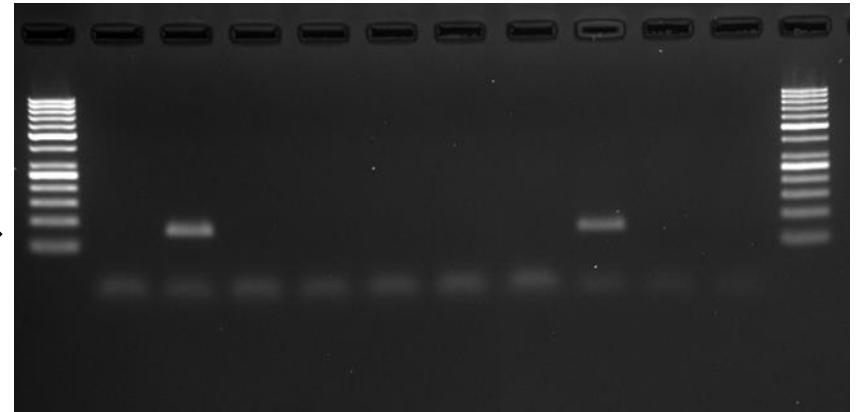

Left ventricle: MYBPC3

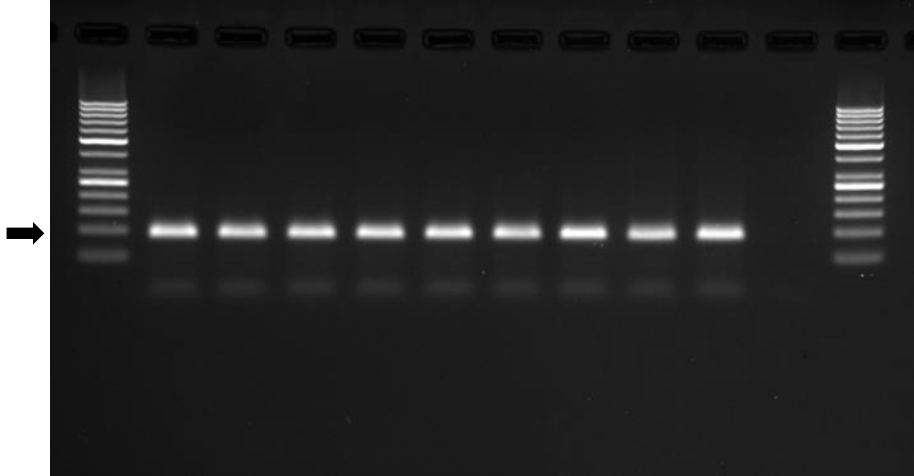

Left ventricle: FHL2

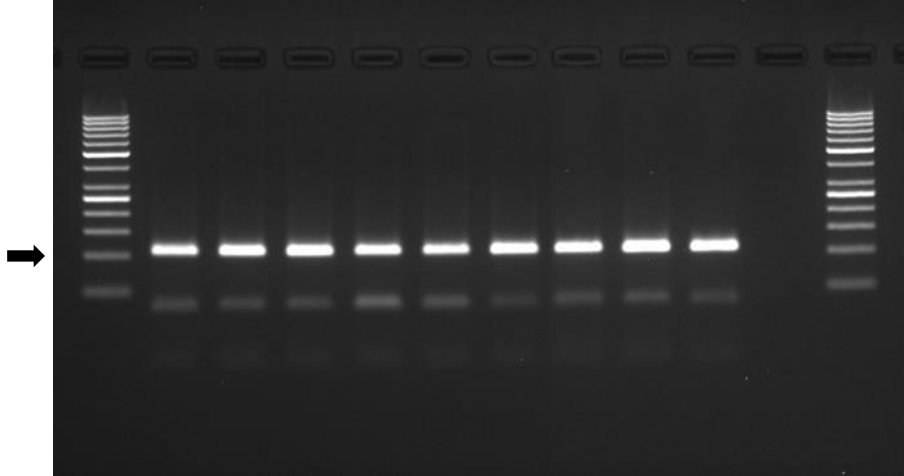

Left ventricle: beta-actin

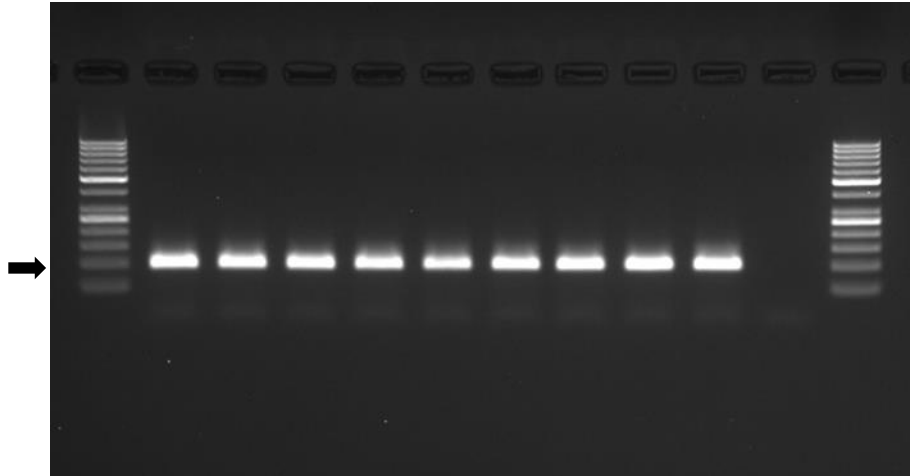

arteria mammaria interna: MYBPHL

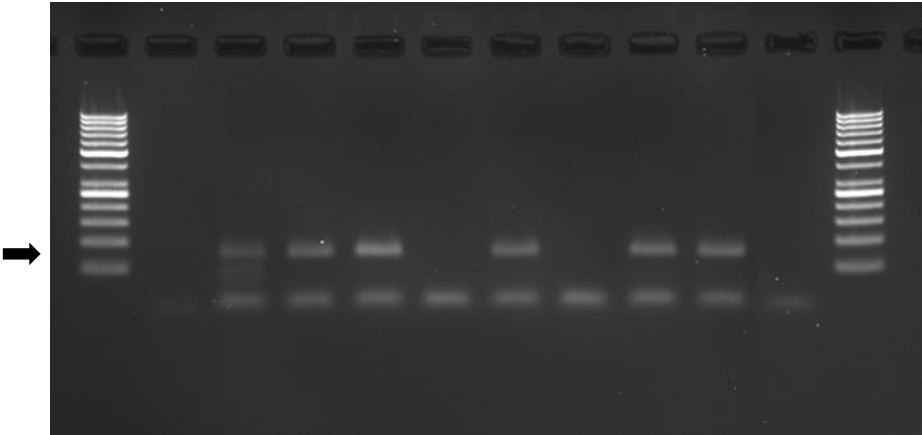

arteria mammaria interna:  
MYBPHL (isoform 1)

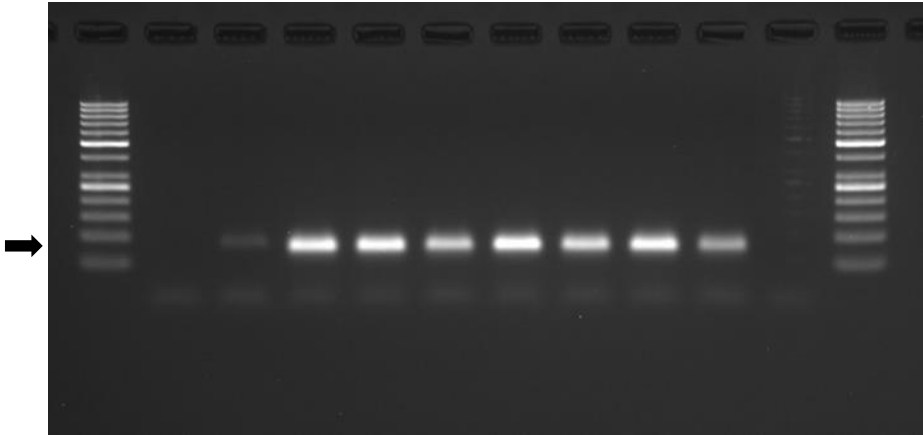

arteria mammaria interna:  
MYBPHL (isoform 2)

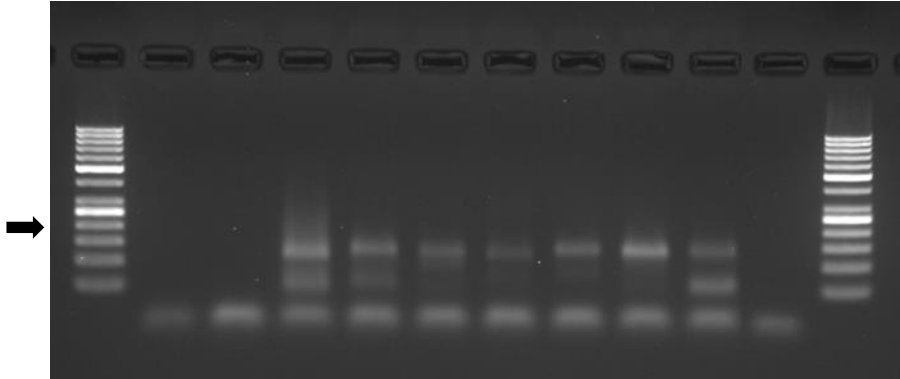

arteria mammaria interna: MYBPH

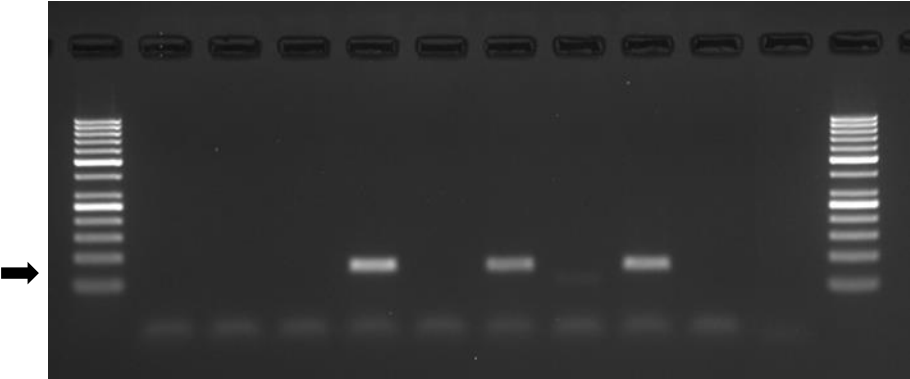

arteria mammaria interna: MYBPC3

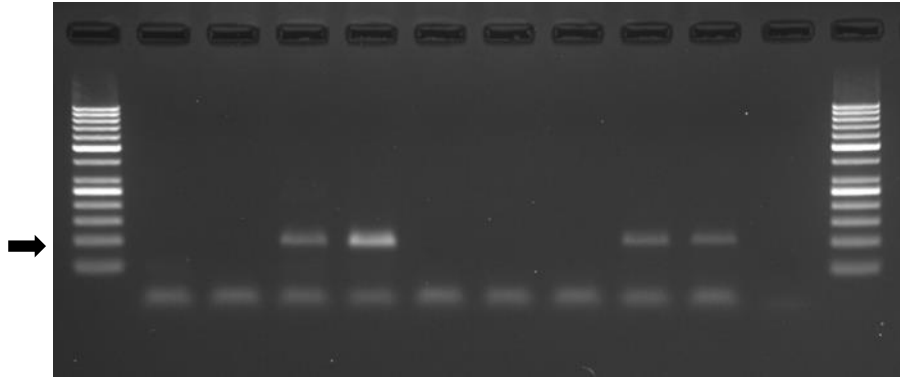

arteria mammaria interna: FHL2

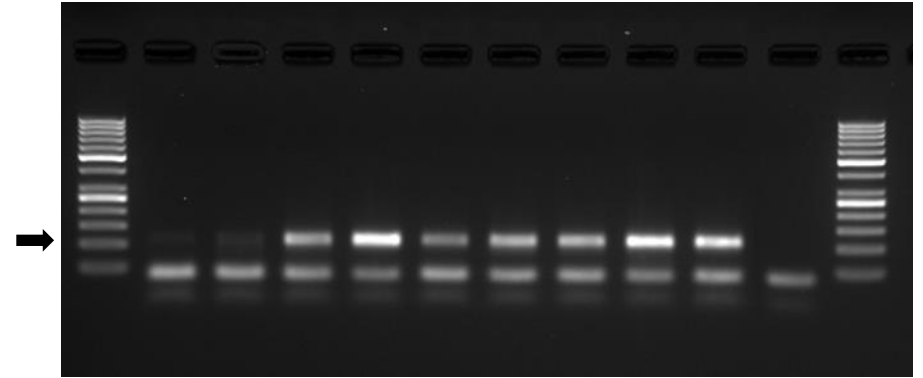

arteria mammaria interna: beta-actin

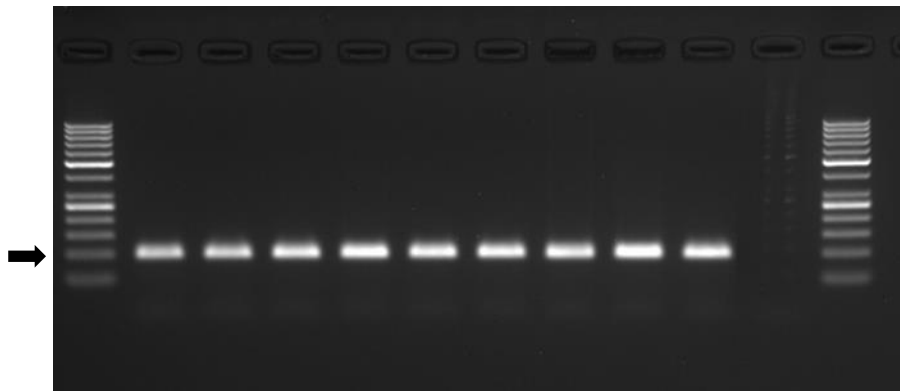

skeletal muscle: MYBPHL

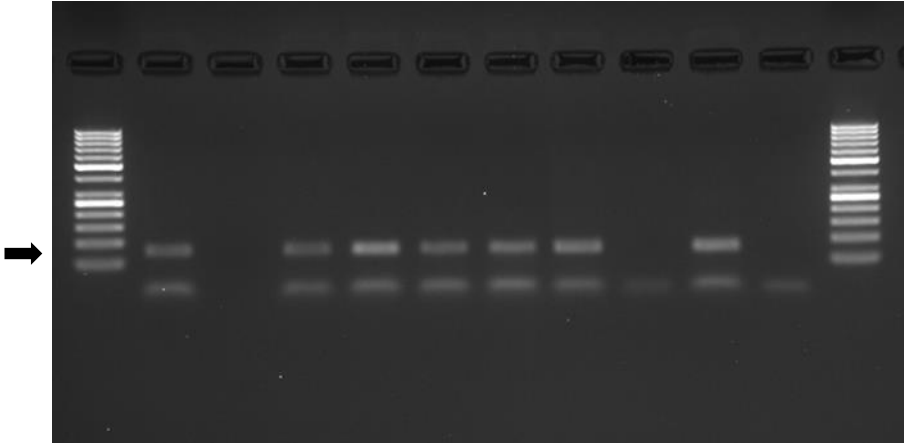

skeletal muscle: MYBPHL (isoform 1)

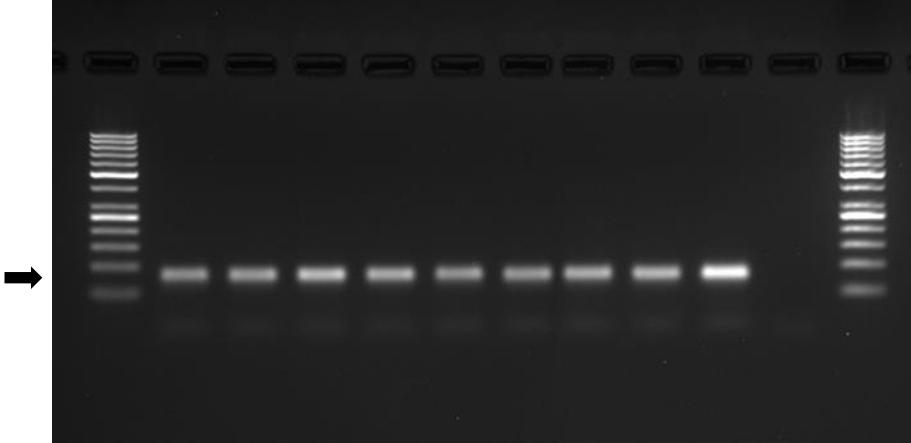

skeletal muscle: MYBPHL (isoform 2)

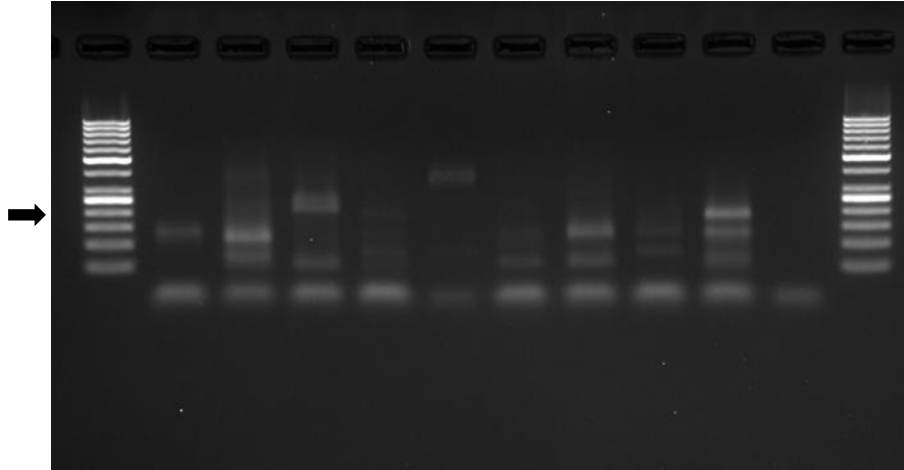

skeletal muscle: MYBPH

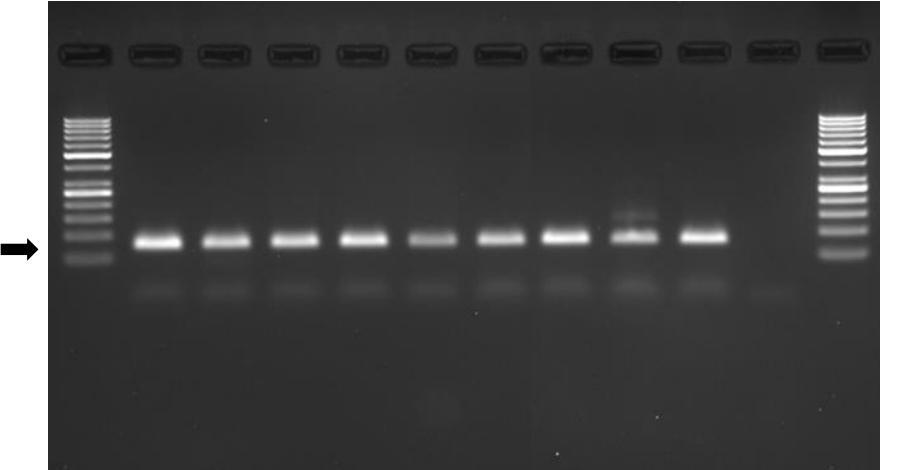

skeletal muscle: MYBPC3

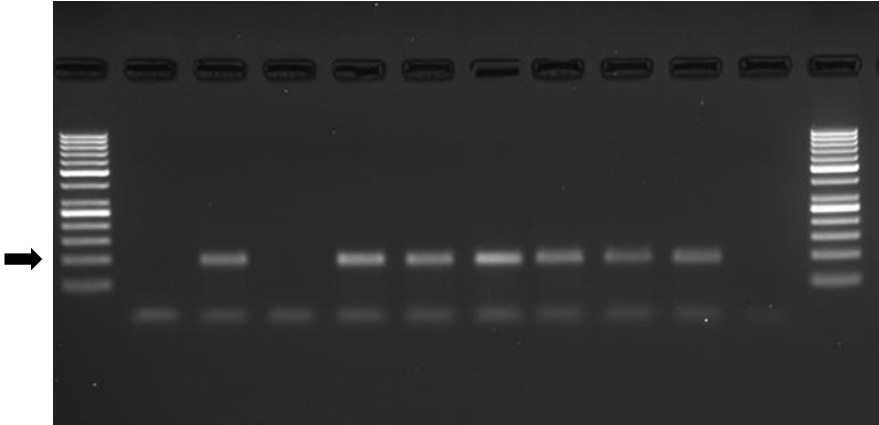

skeletal muscle: FHL2

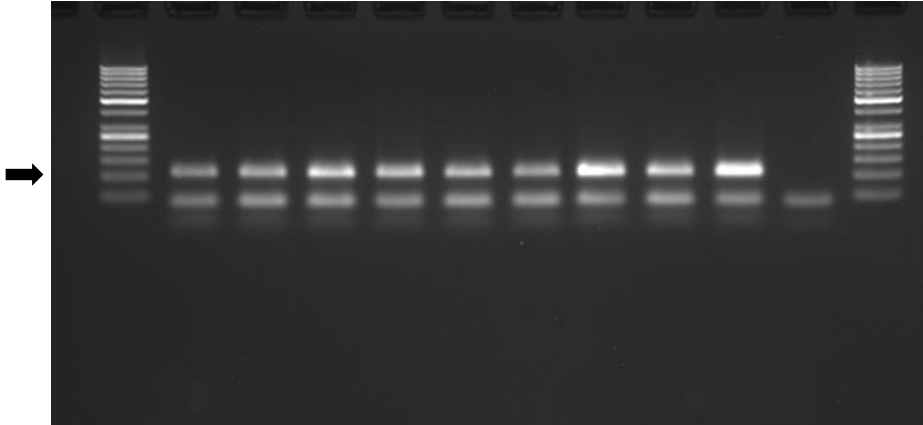

skeletal muscle: beta-actin

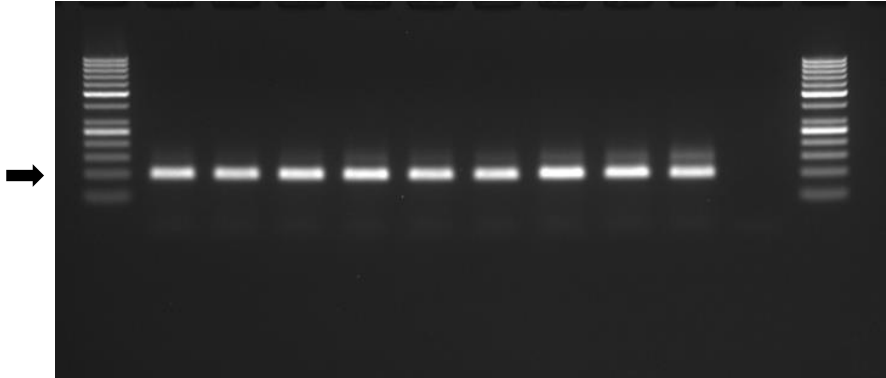

Supplement: MOESM1 [file 41598_2019_46123_MOESM1_ESM.pdf]
